# Supplementary material
Source: Springer Nature journal article supplement (https://www.springermedizin.de/resource/supplementary/12877_2014_1011_MOESM1_ESM.pdf/9440908)
Supplement: MOESM1 [file 9440908]

CPRD acceptable patients  
(N=11,522,152)

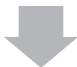

Patients aged  $\geq 65$  with a first AD diagnosis between 01 January 2008 and 31 December 2010  
(N=8,224)

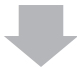

Exclusion of patients with early-onset AD or a non-AD diagnosis after index date  
(N=8,114)

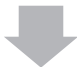

Patients with continuous enrollment 3 years prior to and 1 year post index date  
(N=3,911)

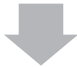

Matched with GOA controls  
(N=3,896)
